# Supplementary material for: Transcriptomic and physiological responses of contrasting maize genotypes to drought stress
Source: Front Plant Sci. 2022 Aug 3;13:928897. doi: 10.3389/fpls.2022.928897 (PMC9381927; doi:10.3389/fpls.2022.928897)
Supplement: Supplementary file 1 [file Data_Sheet_1.xlsx]

## Sheet: Supplementary Table1
Supplementary Table1. Summary information of RNA-Seq among SD902 and SD609.
Sample	Raw reads	Raw Bases(bp)	Clean reads	Clean Bases(bp)	Clean rate(%)	Q20 rate(%)	Q30 rate(%)
SD902_CK_1	35179657	10553897100	34243747	9557315120	97.34	98.24	93.82
SD902_CK_2	39120160	11736048000	38013398	10763892700	97.17	98.14	93.5
SD902_CK_3	31590472	9477141600	30713449	8609303889	97.22	98.21	93.75
SD902_DS_1	33185821	9955746300	32282928	9111542713	97.28	98.25	93.87
SD902_DS_2	22712850	6813855000	22130565	6281246319	97.44	98.14	93.52
SD902_DS_3	24951572	7485471600	24356098	6877966929	97.61	98.16	93.56
SD609_CK_1	24317599	7295279700	23741737	6639161026	97.63	98.13	93.48
SD609_CK_2	24810404	7443121200	24188721	6829947536	97.49	98.12	93.46
SD609_CK_3	23760748	7128224400	23303226	6604383733	98.07	98.4	94.22
SD609_DS_1	24060356	7218106800	23554524	6651566701	97.9	98.4	94.26
SD609_DS_2	24217155	7265146500	23739219	6743866472	98.03	98.36	94.1
SD609_DS_3	23102322	6930696600	22625278	6440515297	97.94	98.32	93.95

## Sheet: Supplementary Table2
Supplementary Table2. GO enrichemnt in SD609 variety.											Supplementary Table 2. GO enrichemnt in SD902 variety.
ID	Description	GeneRatio	BgRatio	pvalue	p.adjust	qvalue	geneID	Count	type		ID	Description	GeneRatio	BgRatio	pvalue	p.adjust	qvalue	geneID	Count	type
GO:0015979	photosynthesis	88/1861	151/7789	7.50735e-20	7.36471e-17	7.0411e-17	cl24591_1(646),cl5838_2,csu1028(lhcb),FDX1,fdx2,fdx5,gpa1,gpm571,gpm930,IDP1447,lhcb3,lhcb5,lhcb6,lhcb7,LOC100101547,LOC100191544,LOC100191684,LOC100191715,LOC100191875,LOC100191984,LOC100216729,LOC100272548,LOC100273026,LOC100273117,LOC100273752,LOC100274453,LOC100275181,LOC100275243,LOC100276340,LOC100276619,LOC100278127,LOC100278794,LOC100280410,LOC100280994,LOC100281199,LOC100281235,LOC100281…	88	BP		GO:0015979	photosynthesis	92/2413	151/7789	1.78039e-14	1.76258e-11	1.62109e-11	cl24591_1(646),cl5838_2,csu1028(lhcb),FDX1,fdx2,fdx5,gpa1,gpm35,gpm571,gpm930,lhcb3,lhcb5,lhcb6,lhcb7,LOC100101547,LOC100191544,LOC100191684,LOC100191715,LOC100191875,LOC100191984,LOC100192036,LOC100216729,LOC100273026,LOC100273117,LOC100273752,LOC100274453,LOC100274771,LOC100275181,LOC100275243,LOC100276340,LOC100276619,LOC100280410,LOC100280994,LOC100281199,LOC100281235,LOC100281248,LOC10028134…	92	BP
GO:0009765	photosynthesis, light harvesting	27/1861	31/7789	1.5823e-13	7.76121e-11	7.42018e-11	csu1028(lhcb),gpm571,lhcb3,lhcb5,lhcb6,lhcb7,LOC100191715,LOC100216729,LOC100273752,LOC100274453,LOC100280410,LOC100281791,LOC100281879,LOC100282021,LOC100282054,LOC100282214,LOC100282512,LOC100282647,LOC100283212,LOC100284154,LOC103643653,LOC103651575,LOC103651577,LOC103651578,pco076489,pco113787,psb29	27	BP		GO:0009765	photosynthesis, light harvesting	29/2413	31/7789	3.56413e-13	1.76424e-10	1.62262e-10	csu1028(lhcb),gpm571,lhcb3,lhcb5,lhcb6,lhcb7,LOC100191715,LOC100216729,LOC100273752,LOC100274453,LOC100280410,LOC100281248,LOC100281791,LOC100281879,LOC100282021,LOC100282054,LOC100282214,LOC100282512,LOC100282647,LOC100283212,LOC100284154,LOC103643653,LOC103651575,LOC103651577,LOC103651578,pco076489,pco113787,psb29,si486069e02	29	BP
GO:0019684	photosynthesis, light reaction	37/1861	69/7789	8.75728e-08	2.55151e-05	2.43939e-05	csu1028(lhcb),gpm571,IDP1447,lhcb3,lhcb5,lhcb6,lhcb7,LOC100101547,LOC100191684,LOC100191715,LOC100216729,LOC100273752,LOC100274453,LOC100276340,LOC100276619,LOC100280410,LOC100281235,LOC100281791,LOC100281879,LOC100282021,LOC100282043,LOC100282054,LOC100282214,LOC100282512,LOC100282647,LOC100283212,LOC100284154,LOC103643653,LOC103651575,LOC103651577,LOC103651578,LOC103652847,pco076489,pco113787,p…	37	BP		GO:0019684	photosynthesis, light reaction	40/2413	69/7789	2.91371e-06	0.000961525	0.000884338	csu1028(lhcb),gpm571,lhcb3,lhcb5,lhcb6,lhcb7,LOC100101547,LOC100191684,LOC100191715,LOC100192036,LOC100216729,LOC100273752,LOC100274453,LOC100276340,LOC100276619,LOC100280410,LOC100281235,LOC100281248,LOC100281791,LOC100281879,LOC100282021,LOC100282043,LOC100282054,LOC100282214,LOC100282512,LOC100282647,LOC100283212,LOC100284154,LOC100383955,LOC103643653,LOC103651575,LOC103651577,LOC103651578,LOC…	40	BP
GO:0018298	protein-chromophore linkage	25/1861	39/7789	1.04037e-07	2.55151e-05	2.43939e-05	csu1028(lhcb),gpm571,lhcb3,lhcb5,lhcb6,lhcb7,LOC100191715,LOC100216729,LOC100273752,LOC100274453,LOC100280410,LOC100281791,LOC100281879,LOC100282021,LOC100282054,LOC100282214,LOC100282512,LOC100283212,LOC100284154,LOC100381811,LOC103643653,LOC103651575,LOC103651577,LOC103651578,psb29	25	BP		GO:0018298	protein-chromophore linkage	26/2413	39/7789	4.59402e-06	0.00113702	0.00104574	csu1028(lhcb),gpm571,lhcb3,lhcb5,lhcb6,lhcb7,LOC100191715,LOC100216729,LOC100273752,LOC100274453,LOC100280410,LOC100281248,LOC100281791,LOC100281879,LOC100282021,LOC100282054,LOC100282214,LOC100282512,LOC100283212,LOC100284154,LOC103643653,LOC103651575,LOC103651577,LOC103651578,psb29,si486069e02	26	BP
GO:0006091	generation of precursor metabolites and energy	70/1861	187/7789	1.94757e-05	0.00382113	0.00365323	AGP2,AGPLS3,ald1,AY110170,csu1028(lhcb),csu474(rpS14),GAPC3,gpm541,gpm571,IDP1438,IDP1447,lhcb3,lhcb5,lhcb6,lhcb7,LOC100101531,LOC100101547,LOC100191222,LOC100191684,LOC100191715,LOC100193689,LOC100216729,LOC100272913,LOC100273752,LOC100274453,LOC100274515,LOC100276340,LOC100276619,LOC100280324,LOC100280410,LOC100281235,LOC100281237,LOC100281791,LOC100281879,LOC100282021,LOC100282043,LOC100282054…	70	BP		GO:1901606	alpha-amino acid catabolic process	18/2413	24/7789	1.12856e-05	0.00223455	0.00205517	AY110562,cl32678_1b,IDP232,IDP248,LOC100273340,LOC100281042,LOC100281186,LOC100281269,LOC100281532,LOC100282150,LOC100283966,LOC100284742,LOC100285115,LOC100381820,LOC100384215,LOC103627433,LOC541946,pal3	18	BP
GO:0015995	chlorophyll biosynthetic process	9/1861	12/7789	0.000267434	0.0437254	0.0418041	LOC100273426,LOC100283531,LOC100381341,LOC103625782,LOC103634652,LOC103652847,oy1,pco077228,pcr1	9	BP		GO:0009063	cellular amino acid catabolic process	19/2413	27/7789	2.86623e-05	0.00472928	0.00434963	AY110562,cl32678_1b,IDP232,IDP248,LOC100273340,LOC100280779,LOC100281042,LOC100281186,LOC100281269,LOC100281532,LOC100282150,LOC100283966,LOC100284742,LOC100285115,LOC100381820,LOC100384215,LOC103627433,LOC541946,pal3	19	BP
GO:0009579	thylakoid	105/2163	204/9303	8.25521e-19	1.41542e-16	1.34802e-16	cl24591_1(646),cl5838_2,csu1028(lhcb),csu309(atpc),gpb1,gpm472,gpm571,gpm930,IDP1986,lhcb3,lhcb5,lhcb6,lhcb7,LOC100191684,LOC100191715,LOC100191984,LOC100192779,LOC100216729,LOC100272318,LOC100272548,LOC100272947,LOC100273026,LOC100273117,LOC100273445,LOC100273752,LOC100274305,LOC100274453,LOC100275181,LOC100275243,LOC100275335,LOC100276366,LOC100276619,LOC100277436,LOC100278127,LOC100278794,LOC1…	105	CC		GO:1901605	alpha-amino acid metabolic process	74/2413	163/7789	6.56334e-05	0.00928244	0.00853728	ALS2,aprl1,aprl2,asn1,asn2,asn3,asn4,AY109740,AY109859,AY110562,bf1,cl32678_1b,cl345_1a,csu134,csu503(met),dps1,gln1,gln3,GLN6,gpm584,hmt4,IDP232,IDP248,IDP3798,IDP664,LOC100191977,LOC100192064,LOC100192461,LOC100193891,LOC100193934,LOC100194039,LOC100216722,LOC100272983,LOC100273340,LOC100274239,LOC100279620,LOC100281042,LOC100281078,LOC100281186,LOC100281269,LOC100281532,LOC100281709,LOC1002821…	74	BP
GO:0009521	photosystem	61/2163	92/9303	1.34802e-18	1.41542e-16	1.34802e-16	cl24591_1(646),cl5838_2,csu1028(lhcb),gpm571,gpm930,lhcb3,lhcb5,lhcb6,lhcb7,LOC100191684,LOC100191715,LOC100191984,LOC100216729,LOC100272548,LOC100273117,LOC100273752,LOC100274453,LOC100275181,LOC100275243,LOC100278127,LOC100278794,LOC100280410,LOC100280994,LOC100281199,LOC100281349,LOC100281630,LOC100281679,LOC100281791,LOC100281879,LOC100281930,LOC100282021,LOC100282027,LOC100282049,LOC10028205…	61	CC		GO:0009074	aromatic amino acid family catabolic process	11/2413	13/7789	9.96484e-05	0.0109613	0.0100814	cl32678_1b,IDP248,LOC100281042,LOC100281532,LOC100283966,LOC100284742,LOC100285115,LOC100381820,LOC100384215,LOC103627433,pal3	11	BP
GO:0044436	thylakoid part	91/2163	168/9303	2.36238e-18	1.65367e-16	1.57492e-16	cl24591_1(646),cl5838_2,csu1028(lhcb),csu309(atpc),gpb1,gpm571,gpm930,lhcb3,lhcb5,lhcb6,lhcb7,LOC100191684,LOC100191715,LOC100191984,LOC100192779,LOC100216729,LOC100272548,LOC100273026,LOC100273117,LOC100273752,LOC100274305,LOC100274453,LOC100275181,LOC100275243,LOC100276366,LOC100276619,LOC100277436,LOC100278127,LOC100278794,LOC100280410,LOC100280994,LOC100281020,LOC100281199,LOC100281276,LOC100…	91	CC		GO:0042537	benzene-containing compound metabolic process	11/2413	13/7789	9.96484e-05	0.0109613	0.0100814	cl32678_1b,LOC100281042,LOC100281532,LOC100283966,LOC100284742,LOC100285115,LOC100381820,LOC100384215,LOC103627433,LOC103630717,pal3	11	BP
GO:0034357	photosynthetic membrane	87/2163	163/9303	4.55775e-17	2.39282e-15	2.27887e-15	cl24591_1(646),cl5838_2,csu1028(lhcb),csu309(atpc),gpb1,gpm571,gpm930,lhcb3,lhcb5,lhcb6,lhcb7,LOC100191684,LOC100191715,LOC100191984,LOC100192779,LOC100216729,LOC100272548,LOC100273026,LOC100273117,LOC100273752,LOC100274305,LOC100274453,LOC100275181,LOC100275243,LOC100276366,LOC100276619,LOC100277436,LOC100278127,LOC100278794,LOC100280410,LOC100280994,LOC100281199,LOC100281276,LOC100281300,LOC100…	87	CC		GO:0072330	monocarboxylic acid biosynthetic process	65/2413	145/7789	0.000278594	0.0220505	0.0202804	acpt1,asn1,asn2,asn3,asn4,AY110170,cl20712_1(629),cl525_1a,cl765_1,csu333,csu43,fae1,IDP1438,IDP2589,IDP49,LOC100191222,LOC100191738,LOC100272913,aoc2,LOC100274470,LOC100274515,LOC100279587,LOC100279917,LOC100279934,LOC100280304,LOC100280823,LOC100281042,LOC100281237,LOC100281532,LOC100282655,LOC100283232,LOC100283818,LOC100284999,LOC100285076,LOC100285115,LOC100304167,LOC100381820,LOC100384215,L…	65	BP
GO:0009522	photosystem I	37/2163	47/9303	1.17868e-15	4.95044e-14	4.7147e-14	csu1028(lhcb),gpm571,gpm930,lhcb3,lhcb5,lhcb6,lhcb7,LOC100191715,LOC100191984,LOC100216729,LOC100273752,LOC100274453,LOC100275243,LOC100280410,LOC100281679,LOC100281791,LOC100281879,LOC100282021,LOC100282027,LOC100282054,LOC100282214,LOC100282512,LOC100283212,LOC100283327,LOC100284154,LOC100284847,LOC100285458,LOC103625835,LOC103640891,LOC103643653,LOC103651575,LOC103651577,LOC103651578,pco139896…	37	CC		GO:0032787	monocarboxylic acid metabolic process	83/2413	194/7789	0.000294759	0.0220505	0.0202804	acpt1,asn1,asn2,asn3,asn4,AY110170,AY110374,AY112355,cl20712_1(629),cl3036_1,cl40355_1,cl525_1a,cl765_1,csu333,csu43,fae1,gpm375a,IDP1438,IDP2589,IDP49,LOC100191222,LOC100191738,LOC100194244,LOC100272834,LOC100272913,aoc2,LOC100274470,LOC100274515,LOC100279587,LOC100279917,LOC100279934,LOC100280304,LOC100280779,LOC100280823,LOC100281042,LOC100281237,LOC100281532,LOC100282655,LOC100283232,LOC10028…	83	BP
GO:0009523	photosystem II	48/2163	73/9303	1.06818e-14	3.73863e-13	3.5606e-13	cl24591_1(646),cl5838_2,csu1028(lhcb),gpm571,lhcb3,lhcb5,lhcb6,lhcb7,LOC100191684,LOC100191715,LOC100216729,LOC100272548,LOC100273117,LOC100273752,LOC100274453,LOC100275181,LOC100278127,LOC100278794,LOC100280410,LOC100280994,LOC100281199,LOC100281349,LOC100281630,LOC100281791,LOC100281879,LOC100281930,LOC100282021,LOC100282049,LOC100282054,LOC100282214,LOC100282512,LOC100283212,LOC100284154,LOC10…	48	CC		GO:0009698	phenylpropanoid metabolic process	17/2413	26/7789	0.000308493	0.0220505	0.0202804	cad,cncr1,comt,lac3,lac4,LOC100193025,LOC100280258,LOC100281042,LOC100281532,LOC100281551,LOC100282094,LOC100285115,LOC100381820,LOC100384215,LOC100502492,LOC103627433,pal3	17	BP
GO:0042651	thylakoid membrane	69/2163	145/9303	8.9641e-11	2.68923e-09	2.56117e-09	cl24591_1(646),csu1028(lhcb),csu309(atpc),gpb1,gpm571,lhcb3,lhcb5,lhcb6,lhcb7,LOC100191684,LOC100191715,LOC100192779,LOC100216729,LOC100272548,LOC100273026,LOC100273117,LOC100273752,LOC100274305,LOC100274453,LOC100275181,LOC100276366,LOC100276619,LOC100277436,LOC100278127,LOC100278794,LOC100280410,LOC100281199,LOC100281276,LOC100281300,LOC100281620,LOC100281791,LOC100281879,LOC100282021,LOC100282…	69	CC		GO:1901136	carbohydrate derivative catabolic process	17/2413	26/7789	0.000308493	0.0220505	0.0202804	LOC100191807,LOC100273065,LOC100273469,LOC100274400,LOC100275812,LOC100280135,LOC100281817,LOC100282150,LOC100283098,LOC100284124,LOC100284387,LOC100284769,LOC100384000,LOC103634645,si660041a03,TIDP3736,umc1302	17	BP
GO:0044434	chloroplast part	98/2163	248/9303	4.99125e-09	1.3102e-07	1.24781e-07	AY109804,CFM3,cl25041_1a,cl26646_1,cl32009_1b,cl46598_1,cl627_1,csu1028(lhcb),csu309(atpc),ERA1,gpb1,gpm571,hpl1,hsp26,IDP1447,lhcb3,lhcb5,lhcb6,lhcb7,LOC100101547,LOC100191483,LOC100191715,LOC100192779,LOC100193465,LOC100216729,LOC100272318,LOC100272947,LOC100273752,LOC100274305,LOC100274453,LOC100275335,LOC100276366,LOC100276619,LOC100277436,LOC100279620,LOC100280211,LOC100280410,LOC100281276,L…	98	CC		GO:0044272	sulfur compound biosynthetic process	33/2413	63/7789	0.00031277	0.0220505	0.0202804	aprl1,aprl2,AY112355,bth1,cl345_1a,cl765_1,csu503(met),gsh1,hmt4,IDP664,LOC100216722,LOC100272834,LOC100282324,LOC100282559,LOC100283818,LOC100502310,LOC103631673,LOC103646525,LOC542483,LOC542607,pco076481,pco084078,pco111209,pco146545,sam2,sat1,sat3,si683027d02(142),thi1,thi2,TIDP2941,TIDP2999,TIDP3524	33	BP
GO:0044435	plastid part	98/2163	252/9303	1.31811e-08	3.07558e-07	2.92913e-07	AY109804,CFM3,cl25041_1a,cl26646_1,cl32009_1b,cl46598_1,cl627_1,csu1028(lhcb),csu309(atpc),ERA1,gpb1,gpm571,hpl1,hsp26,IDP1447,lhcb3,lhcb5,lhcb6,lhcb7,LOC100101547,LOC100191483,LOC100191715,LOC100192779,LOC100193465,LOC100216729,LOC100272318,LOC100272947,LOC100273752,LOC100274305,LOC100274453,LOC100275335,LOC100276366,LOC100276619,LOC100277436,LOC100279620,LOC100280211,LOC100280410,LOC100281276,L…	98	CC		GO:0006270	DNA replication initiation	11/2413	14/7789	0.000334099	0.0220505	0.0202804	cl18116_1,LOC100279753,LOC100281587,LOC100304310,LOC100382678,LOC100383139,LOC100501077,MCM6,MCM7,ROA2,si606069d05	11	BP
GO:0009534	chloroplast thylakoid	57/2163	132/9303	2.71015e-07	5.17392e-06	4.92754e-06	csu1028(lhcb),csu309(atpc),gpb1,gpm571,lhcb3,lhcb5,lhcb6,lhcb7,LOC100191715,LOC100192779,LOC100216729,LOC100272947,LOC100273752,LOC100274305,LOC100274453,LOC100275335,LOC100276366,LOC100276619,LOC100277436,LOC100280410,LOC100281276,LOC100281300,LOC100281620,LOC100281791,LOC100281879,LOC100282021,LOC100282054,LOC100282214,LOC100282512,LOC100282647,LOC100283212,LOC100284154,LOC100284608,LOC10028548…	57	CC		GO:0044283	small molecule biosynthetic process	150/2413	385/7789	0.00039191	0.0242494	0.0223028	acpt1,ALS2,aprl1,aprl2,asn1,asn2,asn3,asn4,AY109740,AY109859,AY110170,bf1,bth1,cl20712_1(629),cl25041_1a,cl315_1,cl345_1a,cl525_1a,cl627_1,cl765_1,csu333,csu43,csu503(met),dps1,fae1,gln1,gln3,GLN6,gpm370,gpm584,hmt4,IDP1438,IDP2589,IDP49,IDP664,LOC100191222,LOC100191738,LOC100191860,LOC100191977,LOC100192461,LOC100193689,LOC100193891,LOC100193934,LOC100194039,LOC100216722,LOC100272913,aoc2,LOC100…	150	BP
GO:0031976	plastid thylakoid	57/2163	132/9303	2.71015e-07	5.17392e-06	4.92754e-06	csu1028(lhcb),csu309(atpc),gpb1,gpm571,lhcb3,lhcb5,lhcb6,lhcb7,LOC100191715,LOC100192779,LOC100216729,LOC100272947,LOC100273752,LOC100274305,LOC100274453,LOC100275335,LOC100276366,LOC100276619,LOC100277436,LOC100280410,LOC100281276,LOC100281300,LOC100281620,LOC100281791,LOC100281879,LOC100282021,LOC100282054,LOC100282214,LOC100282512,LOC100282647,LOC100283212,LOC100284154,LOC100284608,LOC10028548…	57	CC		GO:0006520	cellular amino acid metabolic process	112/2413	278/7789	0.000508654	0.0296216	0.0272437	ALS2,aprl1,aprl2,asn1,asn2,asn3,asn4,AY109740,AY109859,AY110562,bf1,cl244_1,cl32678_1b,cl345_1a,cl891_1a,csu134,csu503(met),dps1,gln1,gln3,GLN6,gpm584,hmt4,IDP232,IDP248,IDP3798,IDP664,LOC100191816,LOC100191977,LOC100192064,LOC100192461,LOC100193653,LOC100193891,LOC100193934,LOC100194039,LOC100216722,LOC100272983,LOC100273340,LOC100273676,LOC100273682,LOC100273774,LOC100274124,LOC100274239,LOC100…	112	BP
GO:0009654	photosystem II oxygen evolving complex	17/2163	23/9303	3.73468e-07	6.5357e-06	6.22447e-06	cl24591_1(646),LOC100191684,LOC100272548,LOC100273117,LOC100275181,LOC100278127,LOC100278794,LOC100281199,LOC100282049,LOC100284876,LOC103636309,LOC103646199,LOC103647735,LOC103651495,LOC107648855,PSBQ1,TIDP3285	17	CC		GO:0006412	translation	186/2413	496/7789	0.000814942	0.044701	0.0411126	arpp1a,arpp2a,arpp3,cl1797_4,cl38702_1,cl55666_1,cl8500_1a,csu1185,csu36b(rpL19),csu408(grp),gpm217b,gpm447,IDP307,IDP469,IDP483,IDP486,IDP65,LOC100191314,LOC100191826,LOC100191912,LOC100191958,LOC100192600,LOC100192835,LOC100192949,LOC100192963,LOC100192991,LOC100193240,LOC100193269,LOC100193804,LOC100193910,LOC100194224,LOC100194265,LOC100194267,LOC100194345,LOC100216725,LOC100216841,LOC1002168…	186	BP
GO:0009535	chloroplast thylakoid membrane	52/2163	121/9303	1.07187e-06	1.60781e-05	1.53125e-05	csu1028(lhcb),csu309(atpc),gpb1,gpm571,lhcb3,lhcb5,lhcb6,lhcb7,LOC100191715,LOC100192779,LOC100216729,LOC100273752,LOC100274305,LOC100274453,LOC100276366,LOC100276619,LOC100277436,LOC100280410,LOC100281276,LOC100281300,LOC100281620,LOC100281791,LOC100281879,LOC100282021,LOC100282054,LOC100282214,LOC100282512,LOC100283212,LOC100284154,LOC100284608,LOC100285487,LOC100286365,LOC100382352,LOC10038319…	52	CC		GO:0009699	phenylpropanoid biosynthetic process	10/2413	13/7789	0.00085832	0.044701	0.0411126	cad,cncr1,comt,LOC100281042,LOC100281532,LOC100285115,LOC100381820,LOC100384215,LOC103627433,pal3	10	BP
GO:0055035	plastid thylakoid membrane	52/2163	121/9303	1.07187e-06	1.60781e-05	1.53125e-05	csu1028(lhcb),csu309(atpc),gpb1,gpm571,lhcb3,lhcb5,lhcb6,lhcb7,LOC100191715,LOC100192779,LOC100216729,LOC100273752,LOC100274305,LOC100274453,LOC100276366,LOC100276619,LOC100277436,LOC100280410,LOC100281276,LOC100281300,LOC100281620,LOC100281791,LOC100281879,LOC100282021,LOC100282054,LOC100282214,LOC100282512,LOC100283212,LOC100284154,LOC100284608,LOC100285487,LOC100286365,LOC100382352,LOC10038319…	52	CC		GO:0043043	peptide biosynthetic process	187/2413	500/7789	0.000916931	0.044701	0.0411126	arpp1a,arpp2a,arpp3,cl1797_4,cl38702_1,cl55666_1,cl8500_1a,csu1185,csu36b(rpL19),csu408(grp),gpm217b,gpm447,gsh1,IDP307,IDP469,IDP483,IDP486,IDP65,LOC100191314,LOC100191826,LOC100191912,LOC100191958,LOC100192600,LOC100192835,LOC100192949,LOC100192963,LOC100192991,LOC100193240,LOC100193269,LOC100193804,LOC100193910,LOC100194224,LOC100194265,LOC100194267,LOC100194345,LOC100216725,LOC100216841,LOC10…	187	BP
GO:0005759	mitochondrial matrix	17/2163	32/9303	0.000233338	0.00326673	0.00311117	cl19095_1(597),CPNA,LOC100281274,LOC100283563,LOC100283687,LOC100283937,LOC100286211,LOC100384686,LOC103638092,LOC103647953,LOC542483,LOC542607,LON2,pco079267,pco137067a,pdh2,pdlk2	17	CC		GO:0016054	organic acid catabolic process	21/2413	37/7789	0.000993357	0.044701	0.0411126	AY110562,cl32678_1b,IDP232,IDP248,LOC100273340,LOC100280779,LOC100281042,LOC100281186,LOC100281269,LOC100281532,LOC100282150,LOC100283966,LOC100284742,LOC100285115,LOC100381820,LOC100382424,LOC100384215,LOC103627433,LOC541946,pal3,pco097710	21	BP
GO:0098796	membrane protein complex	92/2163	295/9303	0.000914692	0.0120053	0.0114336	AY112119,cl24591_1(646),cl5838_2,csu1028(lhcb),csu309(atpc),gpm571,gpm930,lhcb3,lhcb5,lhcb6,lhcb7,LOC100191684,LOC100191715,LOC100191871,LOC100191984,LOC100192475,LOC100216729,LOC100216858,LOC100272548,LOC100273117,LOC100273752,LOC100273881,LOC100274453,LOC100275181,LOC100275243,LOC100276619,LOC100276964,LOC100277314,LOC100278127,LOC100278794,LOC100279859,LOC100280410,LOC100280994,LOC100281199,LO…	92	CC		GO:0046395	carboxylic acid catabolic process	21/2413	37/7789	0.000993357	0.044701	0.0411126	AY110562,cl32678_1b,IDP232,IDP248,LOC100273340,LOC100280779,LOC100281042,LOC100281186,LOC100281269,LOC100281532,LOC100282150,LOC100283966,LOC100284742,LOC100285115,LOC100381820,LOC100382424,LOC100384215,LOC103627433,LOC541946,pal3,pco097710	21	BP
GO:0019898	extrinsic component of membrane	15/2163	30/9303	0.00123955	0.015312	0.0145829	cl24591_1(646),LOC100272548,LOC100273117,LOC100275181,LOC100278127,LOC100278794,LOC100281199,LOC100282049,LOC103646199,LOC103647735,LOC103649855,LOC103651495,LOC107648855,PSBQ1,TIDP3285	15	CC		GO:0006261	DNA-dependent DNA replication	17/2413	28/7789	0.00107688	0.0463526	0.0426316	cl18116_1,cl44900_1,cl49722_1,LOC100279753,LOC100280411,LOC100280690,LOC100281587,LOC100304310,LOC100382678,LOC100383139,LOC100383660,LOC100501077,MCM6,MCM7,rad51a,ROA2,si606069d05	17	BP
GO:0009570	chloroplast stroma	36/2163	102/9303	0.00380828	0.04443	0.0423143	AY109804,CFM3,cl26646_1,cl32009_1b,ERA1,gpb1,hsp26,IDP1447,LOC100191483,LOC100193465,LOC100272318,LOC100279620,LOC100280211,LOC100281329,LOC100281348,LOC100285487,LOC100286112,LOC100382373,LOC100383193,LOC100857077,LOC103625782,LOC103627701,LOC103643331,LOC103649691,LOC103652847,LOC103654538,LOC103654777,lox6,PCO088312,pco095461,rca1,si486058g10,thi1,thi2,vp14,y1	36	CC		GO:0009579	thylakoid	114/2784	204/9303	5.89369e-15	1.23178e-12	1.12911e-12	cl24591_1(646),cl5838_2,csu1028(lhcb),csu309(atpc),DVR,gpb1,gpm35,gpm472,gpm571,gpm930,IDP1986,lhcb3,lhcb5,lhcb6,lhcb7,LOC100191684,LOC100191715,LOC100191984,LOC100192036,LOC100192779,LOC100216729,LOC100272860,LOC100272947,LOC100273026,LOC100273117,LOC100273387,LOC100273445,LOC100273752,LOC100274305,LOC100274377,LOC100274453,LOC100274771,LOC100275181,LOC100275243,LOC100275335,LOC100275488,LOC1002…	114	CC
GO:1990204	oxidoreductase complex	21/2163	52/9303	0.00429249	0.0474434	0.0451841	cl24591_1(646),LOC100191684,LOC100191807,LOC100272548,LOC100273117,LOC100273469,LOC100275181,LOC100278127,LOC100278794,LOC100281199,LOC100282049,LOC100284124,LOC100284876,LOC103636309,LOC103646199,LOC103647735,LOC103649017,LOC103651495,LOC107648855,PSBQ1,TIDP3285	21	CC		GO:0009521	photosystem	63/2784	92/9303	2.06741e-14	2.16044e-12	1.98036e-12	cl24591_1(646),cl5838_2,csu1028(lhcb),gpm35,gpm571,gpm930,lhcb3,lhcb5,lhcb6,lhcb7,LOC100191684,LOC100191715,LOC100191984,LOC100216729,LOC100273117,LOC100273752,LOC100274453,LOC100274771,LOC100275181,LOC100275243,LOC100280410,LOC100280994,LOC100281199,LOC100281248,LOC100281349,LOC100281630,LOC100281679,LOC100281791,LOC100281879,LOC100281930,LOC100282021,LOC100282027,LOC100282049,LOC100282054,LOC10…	63	CC
GO:0016168	chlorophyll binding	24/3181	34/13041	1.71688e-08	7.27957e-06	6.77716e-06	csu1028(lhcb),gpm571,lhcb3,lhcb5,lhcb6,lhcb7,LOC100191715,LOC100216729,LOC100273752,LOC100274453,LOC100280410,LOC100281791,LOC100281879,LOC100282021,LOC100282054,LOC100282214,LOC100282512,LOC100283212,LOC100284154,LOC103643653,LOC103651575,LOC103651577,LOC103651578,psb29	24	MF		GO:0009522	photosystem I	39/2784	47/9303	6.28213e-14	4.37655e-12	4.01175e-12	csu1028(lhcb),gpm571,gpm930,lhcb3,lhcb5,lhcb6,lhcb7,LOC100191715,LOC100191984,LOC100216729,LOC100273752,LOC100274453,LOC100275243,LOC100280410,LOC100281248,LOC100281679,LOC100281791,LOC100281879,LOC100282021,LOC100282027,LOC100282054,LOC100282214,LOC100282512,LOC100283212,LOC100283327,LOC100284154,LOC100284847,LOC100285458,LOC103625835,LOC103640891,LOC103643653,LOC103651575,LOC103651577,LOC103651…	39	CC
GO:0016830	carbon-carbon lyase activity	39/3181	81/13041	2.81903e-06	0.000597635	0.000556388	ald1,AY110170,AY110562,bx1,cl315_1,gpm277,IDP1438,IDP754,LOC100193689,LOC100272913,LOC100272983,LOC100273126,LOC100273302,LOC100274380,LOC100274515,LOC100274566,LOC100277718,LOC100280309,LOC100282559,LOC100286258,LOC100304279,LOC100381655,LOC100383821,LOC100501865,LOC103627258,LOC103630165,LOC103638134,LOC541622,lox6,me3,pck2,pdc1,pdc2,pdc3,pep1,pep7,sam2,si605032h02,ssu1	39	MF		GO:0044436	thylakoid part	96/2784	168/9303	1.3389e-13	6.99574e-12	6.41261e-12	cl24591_1(646),cl5838_2,csu1028(lhcb),csu309(atpc),gpb1,gpm35,gpm571,gpm930,lhcb3,lhcb5,lhcb6,lhcb7,LOC100191684,LOC100191715,LOC100191984,LOC100192779,LOC100216729,LOC100272860,LOC100273026,LOC100273117,LOC100273387,LOC100273752,LOC100274305,LOC100274453,LOC100274771,LOC100275181,LOC100275243,LOC100275488,LOC100276366,LOC100276619,LOC100277436,LOC100280410,LOC100280994,LOC100281020,LOC100281199,…	96	CC
GO:0046906	tetrapyrrole binding	131/3181	399/13041	6.88642e-05	0.00935408	0.00870849	aos1,cat1,cat2,cl26634_1a,csu1028(lhcb),cyp10,CYP714B3,CYP71C1,CYP727A4,CYP734A7,CYP78A53,gpm571,hpl1,lhcb3,lhcb5,lhcb6,lhcb7,LOC100191304,LOC100191675,LOC100191715,LOC100192482,LOC100192848,LOC100192876,LOC100193331,LOC100194008,LOC100194034,LOC100194085,LOC100216729,LOC100217161,LOC100272764,LOC100272801,LOC100272974,LOC100273010,LOC100273061,LOC100273099,LOC100273248,LOC100273344,LOC100273457,…	131	MF		GO:0034357	photosynthetic membrane	92/2784	163/9303	1.16506e-12	4.86994e-11	4.46401e-11	cl24591_1(646),cl5838_2,csu1028(lhcb),csu309(atpc),gpb1,gpm35,gpm571,gpm930,lhcb3,lhcb5,lhcb6,lhcb7,LOC100191684,LOC100191715,LOC100191984,LOC100192779,LOC100216729,LOC100272860,LOC100273026,LOC100273117,LOC100273387,LOC100273752,LOC100274305,LOC100274453,LOC100274771,LOC100275181,LOC100275243,LOC100275488,LOC100276366,LOC100276619,LOC100277436,LOC100280410,LOC100280994,LOC100281199,LOC100281248,…	92	CC
GO:0004373	glycogen (starch) synthase activity	9/3181	11/13041	0.000101739	0.00935408	0.00870849	du1,GBSSIIa,gss1,LOC100101526,LOC100101527,LOC100101528,LOC100136828,LOC100170236,ss1	9	MF		GO:0009523	photosystem II	50/2784	73/9303	1.02037e-11	3.55428e-10	3.25802e-10	cl24591_1(646),cl5838_2,csu1028(lhcb),gpm35,gpm571,lhcb3,lhcb5,lhcb6,lhcb7,LOC100191684,LOC100191715,LOC100216729,LOC100273117,LOC100273752,LOC100274453,LOC100274771,LOC100275181,LOC100280410,LOC100280994,LOC100281199,LOC100281248,LOC100281349,LOC100281630,LOC100281791,LOC100281879,LOC100281930,LOC100282021,LOC100282049,LOC100282054,LOC100282214,LOC100282512,LOC100283212,LOC100284154,LOC100284876…	50	CC
GO:0016829	lyase activity	95/3181	277/13041	0.000116419	0.00935408	0.00870849	ald1,AY110170,AY110562,bx1,cl10531_1,cl173_1a,cl20712_1(629),cl315_1,cl40355_1,cl46598_1,csu868(trp),csu869(cah),dps1,gpm277,gpm852,hpl1,IDP1438,IDP754,LOC100191243,LOC100191436,LOC100191816,LOC100193689,LOC100216599,LOC100216722,LOC100217081,LOC100272842,LOC100272913,LOC100272983,LOC100273126,LOC100273302,LOC100273676,LOC100273678,LOC100274033,LOC100274124,LOC100274166,LOC100274380,LOC100274515,…	95	MF		GO:0042651	thylakoid membrane	74/2784	145/9303	6.80125e-08	2.03066e-06	1.86139e-06	cl24591_1(646),csu1028(lhcb),csu309(atpc),gpb1,gpm35,gpm571,lhcb3,lhcb5,lhcb6,lhcb7,LOC100191684,LOC100191715,LOC100192779,LOC100216729,LOC100272860,LOC100273026,LOC100273117,LOC100273387,LOC100273752,LOC100274305,LOC100274453,LOC100274771,LOC100275181,LOC100275488,LOC100276366,LOC100276619,LOC100277436,LOC100280410,LOC100281199,LOC100281248,LOC100281300,LOC100281791,LOC100281879,LOC100282021,LOC…	74	CC
GO:0016831	carboxy-lyase activity	27/3181	57/13041	0.000132369	0.00935408	0.00870849	AY110562,gpm277,IDP754,LOC100272983,LOC100273126,LOC100273302,LOC100274380,LOC100274566,LOC100277718,LOC100282559,LOC100286258,LOC100381655,LOC100501865,LOC103627258,LOC103630165,LOC103638134,LOC541622,me3,pck2,pdc1,pdc2,pdc3,pep1,pep7,sam2,si605032h02,ssu1	27	MF		GO:0044434	chloroplast part	112/2784	248/9303	2.04681e-07	5.34729e-06	4.90157e-06	bf1,CFM3,cl25041_1a,cl26646_1,cl32009_1b,cl46598_1,cl627_1,csu1028(lhcb),csu309(atpc),DVR,gpb1,gpm571,hsp26,lhcb3,lhcb5,lhcb6,lhcb7,LOC100101547,LOC100191715,LOC100191736,LOC100192036,LOC100192779,LOC100193465,LOC100193934,LOC100216729,LOC100272860,LOC100272947,LOC100273387,LOC100273752,LOC100274305,LOC100274377,LOC100274453,LOC100275335,LOC100275488,LOC100275546,LOC100275547,LOC100276366,LOC1002…	112	CC
											GO:0044435	plastid part	113/2784	252/9303	2.84207e-07	6.59993e-06	6.04979e-06	bf1,CFM3,cl25041_1a,cl26646_1,cl32009_1b,cl46598_1,cl627_1,csu1028(lhcb),csu309(atpc),DVR,gpb1,gpm571,hsp26,lhcb3,lhcb5,lhcb6,lhcb7,LOC100101547,LOC100191715,LOC100191736,LOC100192036,LOC100192779,LOC100193465,LOC100193934,LOC100216729,LOC100272860,LOC100272947,LOC100273387,LOC100273752,LOC100273953,LOC100274305,LOC100274377,LOC100274453,LOC100275335,LOC100275488,LOC100275546,LOC100275547,LOC1002…	113	CC
											GO:0005840	ribosome	186/2784	463/9303	9.21742e-07	1.92644e-05	1.76586e-05	arpp1a,arpp2a,arpp3,cl1797_4,cl55666_1,cl8500_1a,csu1185,csu36b(rpL19),csu408(grp),csu505(rpL7),gpm217b,gpm447,IDP307,IDP469,IDP483,IDP486,IDP65,LOC100191314,LOC100191814,LOC100191826,LOC100191912,LOC100191958,LOC100192600,LOC100192835,LOC100192863,LOC100192949,LOC100192963,LOC100193240,LOC100193269,LOC100193720,LOC100193804,LOC100193910,LOC100194224,LOC100194265,LOC100194267,LOC100194345,LOC1002…	186	CC
											GO:0009534	chloroplast thylakoid	64/2784	132/9303	4.97932e-06	8.67231e-05	7.94944e-05	csu1028(lhcb),csu309(atpc),DVR,gpb1,gpm571,lhcb3,lhcb5,lhcb6,lhcb7,LOC100191715,LOC100192036,LOC100192779,LOC100216729,LOC100272860,LOC100272947,LOC100273387,LOC100273752,LOC100274305,LOC100274453,LOC100275335,LOC100275488,LOC100276366,LOC100276619,LOC100277436,LOC100280410,LOC100281248,LOC100281300,LOC100281791,LOC100281879,LOC100282021,LOC100282054,LOC100282214,LOC100282512,LOC100282634,LOC1002…	64	CC
											GO:0031976	plastid thylakoid	64/2784	132/9303	4.97932e-06	8.67231e-05	7.94944e-05	csu1028(lhcb),csu309(atpc),DVR,gpb1,gpm571,lhcb3,lhcb5,lhcb6,lhcb7,LOC100191715,LOC100192036,LOC100192779,LOC100216729,LOC100272860,LOC100272947,LOC100273387,LOC100273752,LOC100274305,LOC100274453,LOC100275335,LOC100275488,LOC100276366,LOC100276619,LOC100277436,LOC100280410,LOC100281248,LOC100281300,LOC100281791,LOC100281879,LOC100282021,LOC100282054,LOC100282214,LOC100282512,LOC100282634,LOC1002…	64	CC
											GO:0009654	photosystem II oxygen evolving complex	17/2784	23/9303	1.67422e-05	0.000269163	0.000246728	cl24591_1(646),gpm35,LOC100191684,LOC100273117,LOC100274771,LOC100275181,LOC100281199,LOC100282049,LOC100284876,LOC103636309,LOC103646199,LOC103647735,LOC103651495,LOC103653672,LOC107648855,PSBQ1,TIDP3285	17	CC
											GO:0009535	chloroplast thylakoid membrane	57/2784	121/9303	4.62705e-05	0.000644702	0.000590963	csu1028(lhcb),csu309(atpc),gpb1,gpm571,lhcb3,lhcb5,lhcb6,lhcb7,LOC100191715,LOC100192779,LOC100216729,LOC100272860,LOC100273387,LOC100273752,LOC100274305,LOC100274453,LOC100275488,LOC100276366,LOC100276619,LOC100277436,LOC100280410,LOC100281248,LOC100281300,LOC100281791,LOC100281879,LOC100282021,LOC100282054,LOC100282214,LOC100282512,LOC100282634,LOC100283212,LOC100284154,LOC100284608,LOC10028548…	57	CC
											GO:0055035	plastid thylakoid membrane	57/2784	121/9303	4.62705e-05	0.000644702	0.000590963	csu1028(lhcb),csu309(atpc),gpb1,gpm571,lhcb3,lhcb5,lhcb6,lhcb7,LOC100191715,LOC100192779,LOC100216729,LOC100272860,LOC100273387,LOC100273752,LOC100274305,LOC100274453,LOC100275488,LOC100276366,LOC100276619,LOC100277436,LOC100280410,LOC100281248,LOC100281300,LOC100281791,LOC100281879,LOC100282021,LOC100282054,LOC100282214,LOC100282512,LOC100282634,LOC100283212,LOC100284154,LOC100284608,LOC10028548…	57	CC
											GO:0042555	MCM complex	9/2784	11/9303	0.000561798	0.00733849	0.0067268	cl18116_1,LOC100281587,LOC100304310,LOC100383139,LOC100501077,MCM6,MCM7,ROA2,si606069d05	9	CC
											GO:0016168	chlorophyll binding	26/4057	34/13041	6.64543e-08	2.85753e-05	2.64418e-05	csu1028(lhcb),gpm571,lhcb3,lhcb5,lhcb6,lhcb7,LOC100191715,LOC100216729,LOC100273752,LOC100274453,LOC100280410,LOC100281248,LOC100281791,LOC100281879,LOC100282021,LOC100282054,LOC100282214,LOC100282512,LOC100283212,LOC100284154,LOC103643653,LOC103651575,LOC103651577,LOC103651578,psb29,si486069e02	26	MF
											GO:0016829	lyase activity	119/4057	277/13041	1.77816e-05	0.00382304	0.0035376	aco2,AY110170,AY110562,cl10531_1,cl12984_1a,cl173_1a,cl20712_1(629),cl244_1,cl315_1,cl40355_1,cl46598_1,csu842,csu868(trp),csu869(cah),dps1,gpm370,gpm852,IDP1438,LOC100383041,IDP754,LOC100191243,LOC100191679,LOC100191816,LOC100191977,LOC100193689,LOC100193934,LOC100194175,LOC100216599,LOC100216722,LOC100217081,LOC100272913,LOC100272983,LOC100273676,LOC100274033,LOC100274124,LOC100274185,LOC100274…	119	MF
											GO:0046906	tetrapyrrole binding	159/4057	399/13041	0.000106518	0.0146413	0.0135481	aos1,apx2,bx2,cat1,cat2,cl6947_1,csu1028(lhcb),cyp10,CYP714B3,CYP71C1,gpm233,gpm571,IDP692,lhcb3,lhcb5,lhcb6,lhcb7,LOC100191539,LOC100191675,LOC100191715,LOC100192105,LOC100192603,LOC100192848,LOC100192876,LOC100193331,LOC100193733,LOC100194008,LOC100194341,LOC100216729,LOC100216995,LOC100217161,LOC100272764,LOC100272801,LOC100272974,LOC100273010,LOC100273099,LOC100273248,LOC100273258,LOC10027328…	159	MF
											GO:0003735	structural constituent of ribosome	157/4057	395/13041	0.000136198	0.0146413	0.0135481	arpp1a,arpp2a,arpp3,cl1797_4,cl55666_1,cl8500_1a,csu1185,csu36b(rpL19),csu408(grp),gpm217b,gpm447,IDP307,IDP469,IDP483,IDP486,IDP65,LOC100191314,LOC100191826,LOC100191912,LOC100191958,LOC100192600,LOC100192835,LOC100192949,LOC100192963,LOC100193240,LOC100193269,LOC100193804,LOC100193910,LOC100194224,LOC100194265,LOC100194267,LOC100194345,LOC100216725,LOC100216841,LOC100216899,LOC100272465,LOC1002…	157	MF
											GO:0016705	oxidoreductase activity	108/4057	264/13041	0.000423872	0.036453	0.0337313	aos1,bx2,cl3036_1,cl32377_1(260),csu333,cyp10,CYP714B3,CYP71C1,fad7,gpm375a,HO1,IDP692,LOC100191539,LOC100191675,LOC100192807,LOC100192827,LOC100192848,LOC100192876,LOC100193331,LOC100193552,LOC100194244,LOC100217161,LOC100272801,LOC100273010,LOC100273207,LOC100273258,LOC100273383,LOC100273436,LOC100273457,LOC100273519,LOC100273589,LOC100273597,LOC100274274,LOC100274356,LOC100274430,LOC100274473,…	108	MF
											GO:0050662	coenzyme binding	148/4057	380/13041	0.000603577	0.0432564	0.0400267	acs7,ALS2,cko3,CKX10,CKX6,cl244_1,cl315_1,cl32377_1(260),cl345_1a,cl40355_1,cl42025_1,cl891_1a,cncr1,csu70,dfr1,DWF1,go1,gpa1,gpb1,gpm175,gpm274,gpm345,gpm540b,gpm573,gpm592,gpm745b,hao1,idh2,IDP154,LOC100383041,LOC100285601,IDP512,LOC100191218,LOC100191548,LOC100191807,LOC100191816,LOC100191900,LOC100192461,LOC100192687,LOC100192827,LOC100193070,LOC100193466,LOC100193552,LOC100193580,LOC10019370…	148	MF
											GO:0004373	glycogen (starch) synthase activity	9/4057	11/13041	0.000775531	0.0476398	0.0440828	du1,GBSSIIa,gss1,LOC100101526,LOC100101527,LOC100101528,LOC100136828,LOC100170236,LOC542481	9	MF

## Sheet: Supplementary Table3
Supplementary Table3. KEGG enrichemnt pathways in SD902 and SD609 varieties.
Number	PathwayID	Pathway	SD902	SD609
1	zma:00194	Photosynthesis proteins	+	+
2	zma:00196	Photosynthesis - antenna proteins	+	+
3	zma:00195	Photosynthesis	+	+
4	zma:03011	Ribosome	+	-
5	zma:03010	Ribosome	+	-
6	zma:02000	Transporters	+	+
7	zma:00710	Carbon fixation in photosynthetic organisms	+	+
8	zma:00500	Starch and sucrose metabolism	+	+
9	zma:00630	Glyoxylate and dicarboxylate metabolism	+	+
10	zma:01004	Lipid biosynthesis proteins	+	-
11	zma:00199	Cytochrome P450	+	+
12	zma:00480	Glutathione metabolism	+	+
13	zma:00250	Alanine, aspartate and glutamate metabolism	+	+
14	zma:03110	Chaperones and folding catalysts	+	+
15	zma:00010	Glycolysis / Gluconeogenesis	+	+
16	zma:00960	Tropane, piperidine and pyridine alkaloid biosynthesis	+	-
17	zma:00591	Linoleic acid metabolism	+	-
18	zma:00030	Pentose phosphate pathway	+	+
19	zma:00780	Biotin metabolism	+	-
20	zma:04016	MAPK signaling pathway - plant	+	-
21	zma:00941	Flavonoid biosynthesis	+	-
22	zma:04933	AGE-RAGE signaling pathway in diabetic complications	+	-
23	zma:00400	Phenylalanine, tyrosine and tryptophan biosynthesis	+	+
24	zma:00860	Porphyrin and chlorophyll metabolism	+	+
25	zma:00592	alpha-Linolenic acid metabolism	+	+
26	zma:00562	Inositol phosphate metabolism	+	-
27	zma:04712	Circadian rhythm - plant	+	+
28	zma:00564	Glycerophospholipid metabolism	+	-
29	zma:00940	Phenylpropanoid biosynthesis	+	-
30	zma:00460	Cyanoamino acid metabolism	+	+
31	zma:00520	Amino sugar and nucleotide sugar metabolism	+	-
32	zma:00052	Galactose metabolism	+	-
33	zma:00944	Flavone and flavonol biosynthesis	+	-
34	zma:00945	Stilbenoid, diarylheptanoid and gingerol biosynthesis	+	-
35	zma:00561	Glycerolipid metabolism	+	+
36	zma:00270	Cysteine and methionine metabolism	+	+
37	zma:00902	Monoterpenoid biosynthesis	+	-
38	zma:00905	Brassinosteroid biosynthesis	+	-
39	zma:00360	Phenylalanine metabolism	+	-
40	zma:02010	ABC transporters	+	-
41	zma:03450	Non-homologous end-joining	+	-
42	zma:00330	Arginine and proline metabolism	+	+
43	zma:00770	Pantothenate and CoA biosynthesis	+	-
44	zma:00620	Pyruvate metabolism	+	+
45	zma:00130	Ubiquinone and other terpenoid-quinone biosynthesis	+	+
46	zma:99980	Enzymes with EC numbers	+	-
47	zma:00260	Glycine, serine and threonine metabolism	+	+
48	zma:00950	Isoquinoline alkaloid biosynthesis	+	-
49	zma:03009	Ribosome biogenesis	+	+
50	zma:00061	Fatty acid biosynthesis	+	-
51	zma:00536	Glycosaminoglycan binding proteins	+	+
+, the pathway is enriched; -, the pathway is not enriched

## Sheet: Supplementary Table4
Supplementary Table4. The specific primer of qRT-PCR
Gene Name	Forward Primer (5’-3’)	Reverse primer (5’-3’)
GAPDH	CCATCACTGCCACCCAGAAAAC	AGGAACACGGAAGGACATACCAG
LOC542372	GAAGACACGCTCATCCTCACC	CAGTTCGGCATTTCCATCC
LOC103635678	GAAGGTGGGCATTTGTGG	AAGGGAGATGGGAGTGTAGC
me3	CCCAGCGACCTGGTGAAA	TCCAGCAGCACCAGCAAC
LOC100279574	AACGGCTGGATACCCTGCCTCGAGT	CTGCGTCTGCTTGATGTTGTCG
LOC541646	AGCCTAGACTTGTGGGAGCA	CCTCTGGGATATTTGGCTCA
LOC100384529	ATTCACATTTTTGGGCCTTG	GCCAATGAAAATGGGAGAGA
LOC542369	GGAGGGCTTTGGTGTCAATA	TTGTCGAGCAAGCATTTCAC
LOC100272974	TCTGATCCAGTTTGCAGCAC	GTCAGGCACTCTTCCCTCTG
LOC100192779	CGACACCATCACCTTCAAGA	TCGCAGTAGAAGCCGTAGGT
LOC100284745	GACCCTGACTCGCTCCACT	GACAGGATCGTCTCGTCCTC
LOC542321	GGACTTCTTCAACCCGGACT	ATGTAGACGCCGTCCTTGAC
LOC100216729	GACGTCGATCTCCTCTGACC	TCGAACTGCAGGTACTCCAC
LOC542478	ACCTGCAGTTCGAGTTGGAC	GTGGACTTGACTTCGGAGGA
pco070877	AGGGCGAGTAGCGAGAGG	CCAGCAGGTTGTTGCTGAG
LOC100191984	GCAGGTGGAGGAGTTCTACG	GACGCGGTAGAACTGGTAGG

## Sheet: Supplementary Table5
Supplementary Table5. qRT-PCR data of 15 randomly selected genes
Gene ID	SD902_CK	SD902_DS	SD609_CK	SD609_DS
LOC100279574	1	0.19	2.11	0.34
LOC103635678	1	0.23	1.34	0.1
LOC542372	1	0.18	0.85	0.2
me3	1	0.27	1.19	0.43
LOC541646	1	2.61	2.05	2.49
LOC100384529	1	2.13	1.46	1.97
LOC542369	1	1.75	3.18	1.31
LOC100272974	1	0.45	0.45	0.42
LOC100192779	1	0.08	4.25	0.19
LOC100284745	1	0.33	3.08	0.25
LOC542321	1	0.19	1.08	0.31
LOC100216729	1	0.17	2.17	0.23
LOC542478	1	0.12	0.51	0.2
pco070877	1	0.23	4.55	0.27
LOC100191984	1	0.22	3.61	0.18
